# Supplementary material for: Mental health and psychosocial support strategies in highly contagious emerging disease outbreaks of substantial public concern: A systematic scoping review
Source: PubMed Central journal article supplement (PMC7857635; doi:10.1371/journal.pone.0244748), 2021-02-03
Supplement: pone.0244748.s001.pdf [file pone.0244748.s001.pdf]

## S1 Appendix. Search strategies. Search strategies in three electronic databases.

### MEDLINE OVID

Searched 7 May 2020 [1123 records]

1. Resilience, Psychological/
2. social adjustment/
3. Adaptation, Psychological/
4. (post-traumatic growth or posttraumatic growth or stress-related growth).tw,kf.
5. (positiv\$ adj1 (adapt\$ or adjust\$)).tw,kf.
6. (psychol\$ adj1 (adapt\$ or adjust\$)).tw,kf.
7. (resilien\$ or hardiness\$).tw,kf.
8. (cope or coping).tw,kf.
9. ((withstand\$ or overcom\$ or resist\$ or recover\$ or thrive\$ or adapt\$ or adjust\$ or bounce\$ back) adj5 (stress\$ or trauma\$ or adversit\$)).tw,kf.
10. or/1-9
11. exp psychotherapy/
12. Stress, Psychological/th
13. (psychotherap\$ or psycho-therap\$).tw,kf.
14. (behav\$ adj3 (intervention\$ or program\$ or therap\$)).tw,kf.
15. ((cognit\$ or cognitive behavior\$ or CBT) adj3 (intervention\$ or program\$ or therap\$)).tw,kf.
16. (psycho\$ adj3 (intervention\$ or program\$ or therap\$)).tw,kf.
17. relaxation.tw,kf.
18. mindful\$.tw,kf.
19. (counsel?ing or coaching).tw,kf.
20. (third wave adj (psycho\$ or therap\$)).tw,kf.
21. cognit\$ restructur\$.tw,kf.
22. positive psychology.tw,kf.
23. (refram\$ or re-fram\$ or reapprais\$).tw,kf.
24. (stress adj1 (inoculation or manag\$ or reduc\$ or resist\$)).tw,kf.
25. (anxiety adj3 manage\$).tw,kf.
26. "acceptance and commitment".tw,kf.
27. Combined Modality Therapy/
28. (multimodal or multi-modal or combined modal\$).tw,kf.
29. exp Health promotion/
30. (health adj3 (educat\$ or promot\$)).tw,kf.
31. or/11-30
32. 10 and 31
33. (resilien\$ adj5 (train\$ or program\$ or intervention\$ or promot\$ or prevent\$ or enhanc\$ or learn\$ or teach\$ or educat\$ or increas\$ or develop\$ or manag\$ or therap\$ or protocol\$ or treat\$)).tw,kf.
34. (hardiness\$ adj5 (train\$ or program\$ or intervention\$ or promot\$ or prevent\$ or enhanc\$ or learn\$ or teach\$ or educat\$ or increas\$ or develop\$ or manag\$ or therap\$ or protocol\$ or treat\$)).tw,kf.
35. or/32-34
36. exp Infection/

37. (SARS or influenza or flu or MERS or ebola).tw,kf.
38. Pandemic/
39. pandem\$.tw,kf.
40. exp Disease outbreaks/
41. exp Coronavirus/
42. exp Coronavirus infections/
43. (coronavirus or COVID-19 or "2019-nCoV" or "SARS-CoV-2").tw,kf.
44. Quarantine/
45. quarantine.tw,kf.
46. or/36-45
47. 35 and 46
48. exp animals/ not humans.sh.
49. 47 not 48
50. limit 49 to yr="1990 -Current"
51. limit 49 to yr="2000 -Current"

### **Cochrane Central Register of Controlled Trials (CENTRAL)**

Searched 7 May 2020 [2549 records]

- #1 [mh "Resilience, Psychological"]
- #2 [mh "social adjustment"]
- #3 [mh "Adaptation, Psychological"]
- #4 ("post-traumatic growth" or "posttraumatic growth" or "stress-related growth")
- #5 (positiv\* near/1 (adapt\* or adjust\*))
- #6 (psychol\* near/1 (adapt\* or adjust\*))
- #7 (resilien\* or hardiness\*)
- #8 (cope or coping)
- #9 ((withstand\* or overcom\* or resist\* or recover\* or thrive\* or adapt\* or adjust\* or bounc\* back) near/5 (stress\* or trauma\* or adversit\*))
- #10 {or #1-#9}
- #11 [mh psychotherapy]
- #12 MeSH descriptor: [Stress, Psychological] explode all trees and with qualifier(s): [therapy - TH]
- #13 (psychotherap\* or psycho next therap\*)
- #14 (behav\* near/3 (intervention\* or program\* or therap\*))
- #15 ((cognit\* or cognitive next behavior\* or CBT) near/3 (intervention\* or program\* or therap\*))
- #16 (psycho\* near/3 (intervention\* or program\* or therap\*))
- #17 relaxation
- #18 mindful\*
- #19 (counsel\*ing or coaching)
- #20 (third next wave next (psycho\* or therap\*))
- #21 cognit\* next restructur\*
- #22 positive next psychology
- #23 (refram\* or re next fram\* or reapprais\*)
- #24 (stress near/1 (inoculation or manag\* or reduc\* or resist\*))
- #25 (anxiety near/3 manage\*)
- #26 "acceptance and commitment"
- #27 [mh "Combined Modality Therapy"]

- #28 (multimodal\* or multi next modal\* or combined modal\*)
- #29 [mh "Health promotion"]
- #30 (health near/3 (educat\* or promot\*))
- #31 {or #11-#30}
- #32 [mh "Infection"]
- #33 (SARS or influenza or flu or MERS or ebola)
- #34 [mh "Pandemic"]
- #35 pandem\*
- #36 [mh "Disease Outbreaks"]
- #37 [mh "Coronavirus"]
- #38 [mh "Coronavirus Infections"]
- #39 (coronavirus or COVID-19 or "2019-nCoV" or "SARS-CoV-2")
- #40 [mh "Quarantine"]
- #41 quarantine
- #42 {or #32-#41}
- #43 #31 and #42
- #44 #31 and #42 with Publication Year from 2000 to 2020, in Trials

### Web of Science Core Collection

Searched 7 May 2020 [237 records]

#27 #26

Indexes=SCI-EXPANDED, SSCI, A&HCI, CPCI-S, CPCI-SSH, BKCI-S, BKCI-SSH, ESCI, CCR-EXPANDED, IC Timespan=2000-2020

#26 #24 AND #16 Refined by: WEB OF SCIENCE CATEGORIES: ( MULTIDISCIPLINARY SCIENCES OR PUBLIC ENVIRONMENTAL OCCUPATIONAL HEALTH OR SOCIAL SCIENCES BIOMEDICAL OR PSYCHOLOGY MULTIDISCIPLINARY OR PSYCHIATRY )

Indexes=SCI-EXPANDED, SSCI, A&HCI, CPCI-S, CPCI-SSH, BKCI-S, BKCI-SSH, ESCI, CCR-EXPANDED, IC Timespan=1945-2020

#25 #24 AND #16

Indexes=SCI-EXPANDED, SSCI, A&HCI, CPCI-S, CPCI-SSH, BKCI-S, BKCI-SSH, ESCI, CCR-EXPANDED, IC Timespan=1945-2020

#24 #23 OR #20 OR #19 OR #18

Indexes=SCI-EXPANDED, SSCI, A&HCI, CPCI-S, CPCI-SSH, BKCI-S, BKCI-SSH, ESCI, CCR-EXPANDED, IC Timespan=1945-2020

#23 TS=(infect\* or SARS OR influenza or flu or MERS or ebola)

Indexes=SCI-EXPANDED, SSCI, A&HCI, CPCI-S, CPCI-SSH, BKCI-S, BKCI-SSH, ESCI, CCR-EXPANDED, IC Timespan=1945-2020

#22 #21 AND #16

Indexes=SCI-EXPANDED, SSCI, A&HCI, CPCI-S, CPCI-SSH, BKCI-S, BKCI-SSH, ESCI, CCR-EXPANDED, IC Timespan=1945-2020

#21 #20 OR #19 OR #18 OR #17

Indexes=SCI-EXPANDED, SSCI, A&HCI, CPCI-S, CPCI-SSH, BKCI-S, BKCI-SSH, ESCI, CCR-EXPANDED, IC Timespan=1945-2020

#20 TS=quarantine

Indexes=SCI-EXPANDED, SSCI, A&HCI, CPCI-S, CPCI-SSH, BKCI-S, BKCI-SSH, ESCI, CCR-EXPANDED, IC Timespan=1945-2020

#19 TS=(coronavirus or COVID-19 or 2019-nCoV or SARS-CoV-2)

Indexes=SCI-EXPANDED, SSCI, A&HCI, CPCI-S, CPCI-SSH, BKCI-S, BKCI-SSH, ESCI, CCR-EXPANDED, IC Timespan=1945-2020

#18 TS=pandem\*

Indexes=SCI-EXPANDED, SSCI, A&HCI, CPCI-S, CPCI-SSH, BKCI-S, BKCI-SSH, ESCI, CCR-EXPANDED, IC Timespan=1945-2020

#17 TS=(SARS OR influenza or flu or MERS or ebola)

Indexes=SCI-EXPANDED, SSCI, A&HCI, CPCI-S, CPCI-SSH, BKCI-S, BKCI-SSH, ESCI, CCR-EXPANDED, IC Timespan=1945-2020

# 16 #14 or #15

Indexes=SCI-EXPANDED, SSCI, A&HCI, CPCI-S, CPCI-SSH, BKCI-S, BKCI-SSH, ESCI, CCR-EXPANDED, IC Timespan=1945-2020

# 15 TS=((resilience or hardiness) near/3 (train\* or program\* or intervention\* or promot\* or prevent\* or enhanc\* or learn\* or teach\* or educat\* or increas\* or develop\* or manag\* or therap\* or protocol\* or treat\*))

Indexes=SCI-EXPANDED, SSCI, A&HCI, CPCI-S, CPCI-SSH, BKCI-S, BKCI-SSH, ESCI, CCR-EXPANDED, IC Timespan=1945-2020

# 14 #13 AND #6

Indexes=SCI-EXPANDED, SSCI, A&HCI, CPCI-S, CPCI-SSH, BKCI-S, BKCI-SSH, ESCI, CCR-EXPANDED, IC Timespan=1945-2020

# 13 #12 OR #11 OR #10 OR #9 OR #8 OR #7

Indexes=SCI-EXPANDED, SSCI, A&HCI, CPCI-S, CPCI-SSH, BKCI-S, BKCI-SSH, ESCI, CCR-EXPANDED, IC Timespan=1945-2020

# 12 TS=(health near/3 (educat\* or promot\*))

Indexes=SCI-EXPANDED, SSCI, A&HCI, CPCI-S, CPCI-SSH, BKCI-S, BKCI-SSH, ESCI, CCR-EXPANDED, IC Timespan=1945-2020

# 11 TS= ((multimodal\* or "multi modal\*" or "combined modal\*") NEAR/3 (treat\* or therap\* or intervention\* or program\*))

Indexes=SCI-EXPANDED, SSCI, A&HCI, CPCI-S, CPCI-SSH, BKCI-S, BKCI-SSH, ESCI, CCR-EXPANDED, IC Timespan=1945-2020

# 10 TS=("acceptance and commitment")

Indexes=SCI-EXPANDED, SSCI, A&HCI, CPCI-S, CPCI-SSH, BKCI-S, BKCI-SSH, ESCI, CCR-EXPANDED, IC Timespan=1945-2020

# 9 TS=((anxiety near/1 manag\*) or relaxation or mindful\* or counsel\*ing or coaching or "third wave" or refram\* or "re fram\*" or "cognitive restructur\*" or "positive psychology")

Indexes=SCI-EXPANDED, SSCI, A&HCI, CPCI-S, CPCI-SSH, BKCI-S, BKCI-SSH, ESCI, CCR-EXPANDED, IC Timespan=1945-2020

# 8 TS=(stress near/3 (inoculat\* or manag\* or reduc\* or resist\*))

Indexes=SCI-EXPANDED, SSCI, A&HCI, CPCI-S, CPCI-SSH, BKCI-S, BKCI-SSH, ESCI, CCR-EXPANDED, IC Timespan=1945-2020

# 7 TS=((psychotherap\* or "psycho therap\*") or CBT or mindful\* or (behav\* near/3 (intervention\* or program\* or therap\*)) OR ((cognit\* or "cognitive behavior\*" or CBT) near/3 (intervention\* or program\* or therap\*)) OR (psycho\* near/3 (intervention\* or program\* or therap\*)))

Indexes=SCI-EXPANDED, SSCI, A&HCI, CPCI-S, CPCI-SSH, BKCI-S, BKCI-SSH, ESCI, CCR-EXPANDED, IC Timespan=1945-2020

# 6 #5 OR #4 OR #3 OR #2 OR #1

Indexes=SCI-EXPANDED, SSCI, A&HCI, CPCI-S, CPCI-SSH, BKCI-S, BKCI-SSH, ESCI, CCR-EXPANDED, IC Timespan=1945-2020

# 5 TS= ((withstand\* or overcom\* or resist\* or recover\* or thrive\* or adapt\* or adjust\* or "bounc\* back" ) near/1 (stress\* or trauma\* or advers\*))

Indexes=SCI-EXPANDED, SSCI, A&HCI, CPCI-S, CPCI-SSH, BKCI-S, BKCI-SSH, ESCI,

CCR-EXPANDED, IC Timespan=1945-2020

# 4 TS=(psychol\* near/1 (adapt\* or adjust\*))

Indexes=SCI-EXPANDED, SSCI, A&HCI, CPCI-S, CPCI-SSH, BKCI-S, BKCI-SSH, ESCI,  
CCR-EXPANDED, IC Timespan=1945-2020

# 3 TS=(positiv\* near/1 (adapt\* or adjust\*))

Indexes=SCI-EXPANDED, SSCI, A&HCI, CPCI-S, CPCI-SSH, BKCI-S, BKCI-SSH, ESCI,  
CCR-EXPANDED, IC Timespan=1945-2020

# 2 TS=("post traumatic growth" or "posttraumatic growth" or "stress related growth")

Indexes=SCI-EXPANDED, SSCI, A&HCI, CPCI-S, CPCI-SSH, BKCI-S, BKCI-SSH, ESCI,  
CCR-EXPANDED, IC Timespan=1945-2020

# 1 TS=(resilien\* or hardiness\*)

Indexes=SCI-EXPANDED, SSCI, A&HCI, CPCI-S, CPCI-SSH, BKCI-S, BKCI-SSH, ESCI,  
CCR-EXPANDED, IC Timespan=1945-2020
