# Supplementary material for: Mental health and psychosocial support strategies in highly contagious emerging disease outbreaks of substantial public concern: A systematic scoping review
Source: PubMed Central journal article supplement (PMC7857635; doi:10.1371/journal.pone.0244748), 2021-02-03
Supplement: pone.0244748.s002.pdf [file pone.0244748.s002.pdf]

**S1 Table. Eligibility criteria.** Detailed eligibility criteria of the systematic scoping review.

| Criterion           | Description                                                                                                                                                                                                                                                                                                                                                                                                                                                                                                                                                                                                                                                                                                                                                                                                                                                                                                                                                                                                                                                                                                                                                                                                                                                                                                                                                                                                                                                                                                                                                                                                                                                      |
|---------------------|------------------------------------------------------------------------------------------------------------------------------------------------------------------------------------------------------------------------------------------------------------------------------------------------------------------------------------------------------------------------------------------------------------------------------------------------------------------------------------------------------------------------------------------------------------------------------------------------------------------------------------------------------------------------------------------------------------------------------------------------------------------------------------------------------------------------------------------------------------------------------------------------------------------------------------------------------------------------------------------------------------------------------------------------------------------------------------------------------------------------------------------------------------------------------------------------------------------------------------------------------------------------------------------------------------------------------------------------------------------------------------------------------------------------------------------------------------------------------------------------------------------------------------------------------------------------------------------------------------------------------------------------------------------|
| <b>Population</b>   | <p><b>Inclusion:</b></p> <ul style="list-style-type: none"> <li>- all ages and sexes; individuals in anticipation of, during or in the aftermath of an outbreak of a highly contagious emerging disease which include COVID-19, and other hazardous infectious diseases (e.g. viral hemorrhagic fevers)</li> <li>- Ebola epidemic outbreak also considered due to fact that Ebola fever belongs to the group of hazardous infectious diseases</li> <li>- irrespective of health status (e.g. healthcare professionals and crisis personnel; children and adolescents; community members; diseased people; people at elevated risk due to somatic conditions)</li> </ul> <p><b>Exclusion:</b></p> <ul style="list-style-type: none"> <li>- chronic infectious diseases (e.g. HIV/AIDS, tuberculosis, hepatitis B and C, malaria)</li> </ul>                                                                                                                                                                                                                                                                                                                                                                                                                                                                                                                                                                                                                                                                                                                                                                                                                       |
| <b>Intervention</b> | <p><b>Inclusion:</b></p> <ul style="list-style-type: none"> <li>- any psychological intervention intended to foster the adjustment (e.g. mental health, resilience, or related constructs) of individuals exposed or possibly exposed to pandemics or another hazardous infectious disease outbreak and/or to promote their mental health and psychosocial support in such situations</li> <li>- focus on improving the participants' ability to cope with the various stressors of a pandemic (e.g. symptoms and death, quarantine)</li> <li>- any setting (e.g. individual or group setting)</li> <li>- any delivery format (e.g. face-to-face or online)</li> <li>- irrespective of content, theoretical foundation (e.g. cognitive-behavioral therapy, mindfulness) and duration</li> <li>- pharmacological (e.g. antidepressant therapy) and physical interventions (e.g. exercise) only if part of psychological training</li> </ul> <p><b>Exclusion:</b></p> <ul style="list-style-type: none"> <li>- psychological interventions to foster mental health or to promote self-management in people affected by chronic infectious diseases (e.g. HIV)</li> <li>- education interventions to provide knowledge on infectious diseases or to affect behavior change (e.g. hygiene education)</li> <li>- interventions aimed at increasing vaccination rates or at improving immune responses to influenza vaccine</li> <li>- psychological interventions to prevent or to reduce the symptom severity of acute respiratory infections (e.g. flu symptoms)</li> <li>- experimental studies to test the effect of health communication manipulation</li> </ul> |

|                             |                                                                                                                                                                                                                                                                                                                                                                                                                                                                                 |
|-----------------------------|---------------------------------------------------------------------------------------------------------------------------------------------------------------------------------------------------------------------------------------------------------------------------------------------------------------------------------------------------------------------------------------------------------------------------------------------------------------------------------|
| <b>Comparison</b>           | No eligibility criteria                                                                                                                                                                                                                                                                                                                                                                                                                                                         |
| <b>Outcome</b>              | No eligibility criteria                                                                                                                                                                                                                                                                                                                                                                                                                                                         |
| <b>Study design</b>         | <p><b>Inclusion:</b></p> <ul style="list-style-type: none"> <li>- quantitative and qualitative studies focusing on or measuring the effects of the above-defined intervention as well as mixed-methods research designs (e.g. individual and cluster-RCTs, randomized studies, single-group studies, case studies or reports) in order to gain comprehensive view of existing interventions and the body of corresponding research</li> </ul> <p><b>Exclusion:</b></p> <p>/</p> |
| <b>Publication date</b>     | No restrictions                                                                                                                                                                                                                                                                                                                                                                                                                                                                 |
| <b>Publication language</b> | No restrictions                                                                                                                                                                                                                                                                                                                                                                                                                                                                 |
| <b>Publication format</b>   | No restrictions                                                                                                                                                                                                                                                                                                                                                                                                                                                                 |
